# Supplementary material
Source: PubMed Central journal article supplement (PMC5986717)
Supplement: mmc1.pdf [file mmc1.pdf]

YMTHE, Volume 26

## **Supplemental Information**

### **Overexpression of TFEB Drives a Pleiotropic Neurotrophic Effect and Prevents Parkinson's Disease-Related Neurodegeneration**

**Albert Torra, Annabelle Parent, Thais Cuadros, Beatriz Rodríguez-Galván, Esther Ruiz-Bronchal, Andrea Ballabio, Analía Bortolozzi, Miquel Vila, and Jordi Bové**

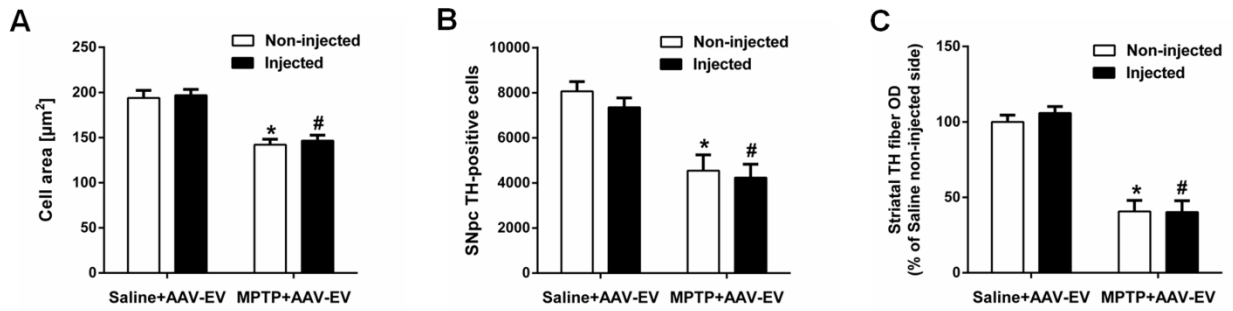

**Supplemental Figure S1. AAV-Empty vector injection does not modify neuronal size and does not prevent neuronal cell loss or atrophy in the MPTP model.** (A) Average cell area of dopaminergic neurons in MPTP-intoxicated mice previously injected with AAV-EV ( $n = 7$ ), and mice treated with saline and previously injected with AAV-EV ( $n = 7$ ); two-way ANOVA, post hoc Tukey's. \* $P < 0.05$  compared to Saline+AAV-EV non-injected side. # $P < 0.05$  compared to Saline+AAV-EV injected side. (B) Stereological cell counts of dopaminergic neurons in substantia nigra pars compacta in MPTP-intoxicated mice previously injected with AAV-EV ( $n = 7$ ), and mice treated with saline and previously injected with AAV-EV ( $n = 8$ ); two-way ANOVA, *post hoc* Tukey's. \* $P < 0.05$  compared to Saline+AAV-EV non-injected side. # $P < 0.05$  compared to Saline+AAV-EV injected side. (C) Optical densitometry of striatal TH-positive dopaminergic fibers in MPTP-intoxicated mice previously injected with AAV-EV ( $n = 7$ ), and mice treated with saline and previously injected with AAV-EV ( $n = 8$ ); two-way ANOVA, *post hoc* Tukey's. \* $P < 0.05$  compared to Saline+AAV-EV non-injected side. # $P < 0.05$  compared to Saline+AAV-EV injected side. In all panels, quantifications were performed 21 days after the last MPTP or saline administration. All data are represented as mean  $\pm$  SEM.
